# Supplementary material for: Two Different Isocitrate Dehydrogenases from Pseudomonas aeruginosa: Enzymology and Coenzyme-Evolutionary Implications
Source: MDPI journal article supplement (doi:10.3390/ijms241914985), 2023-10-07
Supplement: s1 [file s1]

**Table S1.** Primers for the construction of wild-type and mutant *PET-28b (+)-PaIDH1*.

| Primers             | Sequences (5' - 3')                               |
|---------------------|---------------------------------------------------|
| PaIDH1-F            | GGAATTCCATATGGGATACCAAAAGATCCAGGTGC               |
| PaIDH1-R            | ATACCGCTCGAGTTACATCTTGGCAATCATCG                  |
| K346D-F             | CCCACGGCACCGCGCCGGATTACGCCGGCCAGGACAAG            |
| K346D-R             | ATCCGGCGCGGTGCCGTGGGTCGCCTCG                      |
| K346D/Y347I-F       | CCCACGGCACCGCGCCGGATATTGCCGGCCAGG                 |
| K346D/Y347I-R       | AATATCCGGCGCGGTGCCGTGGGTCGCCTCG                   |
| K346D/Y347I/V353A-F | GCCGGCCAGGACAAGGCAAACCCGGGTTCG                    |
| K346D/Y347I/V353A-R | TGCCTTGTCTGGCCGGCAATATCCGGCG                      |
| Y393K/R397S-F       | CGCCGCCAAGACCGTGACCAAAGACTTCGAAAGCCTGATGGACGGCGCG |
| Y393K/R397S-R       | CGCGCCGTCCATCAGGCTTTTGAAGTCTTTGGTCACGGTCTTGGCGGCG |

**Table S2.** Primers for the construction of wild-type and mutant *PET-28b (+)-PaIDH2*.

| Primers  | Sequences (5' - 3')                    |
|----------|----------------------------------------|
| PaIDH2-F | GGAATTCCATATGTCCATCCGCTCGAAGATCACC     |
| PaIDH2-R | ATACCGCTCGAGTTAGGCCAGGCTGTTCGATCG      |
| H589L-F  | CGGCTCGGCACCCAAGCTGGTCCAGCAAC          |
| H589L-R  | CAGCTTGGGTGCCGAGCCGCCGGCGCCGG          |
| R600D-F  | GGAAGAGAACTACCTGCTGTGGGACTCCC          |
| R600D-R  | CAGCAGGTAGTTCTCTTCCACCAGTTGCTGG        |
| R649S-F  | CAACAAGTCGCCGTCGAGCAAGGTCGGCGAC        |
| R649S-R  | GCTCGACGGCGACTTGTTGTTGTCCAGCAG         |
| R600L-F  | CTGGTGGAAGAGAACTACCTGCTGTGGGACTCCCTGGG |
| R600L-R  | CAGCAGGTAGTTCTCTTCCACCAGTTGCTGG        |
| R600I-F  | CTGGTGGAAGAGAACTACCTGATTTGGGACTCCCTGGG |
| R600I-R  | AATCAGGTAGTTCTCTTCCACCAGTTGCTGG        |
| R649L-F  | CAACAAGTCGCCGTCGCTGAAGGTCGGCGAC        |
| R649L-R  | CAGCGACGGCGACTTGTTGTTGTCCAGCAG         |
| R649D-F  | CAACAAGTCGCCGTCGGATAAGGTCGGCGAC        |
| R649D-R  | ATCCGACGGCGACTTGTTGTTGTCCAGCAG         |

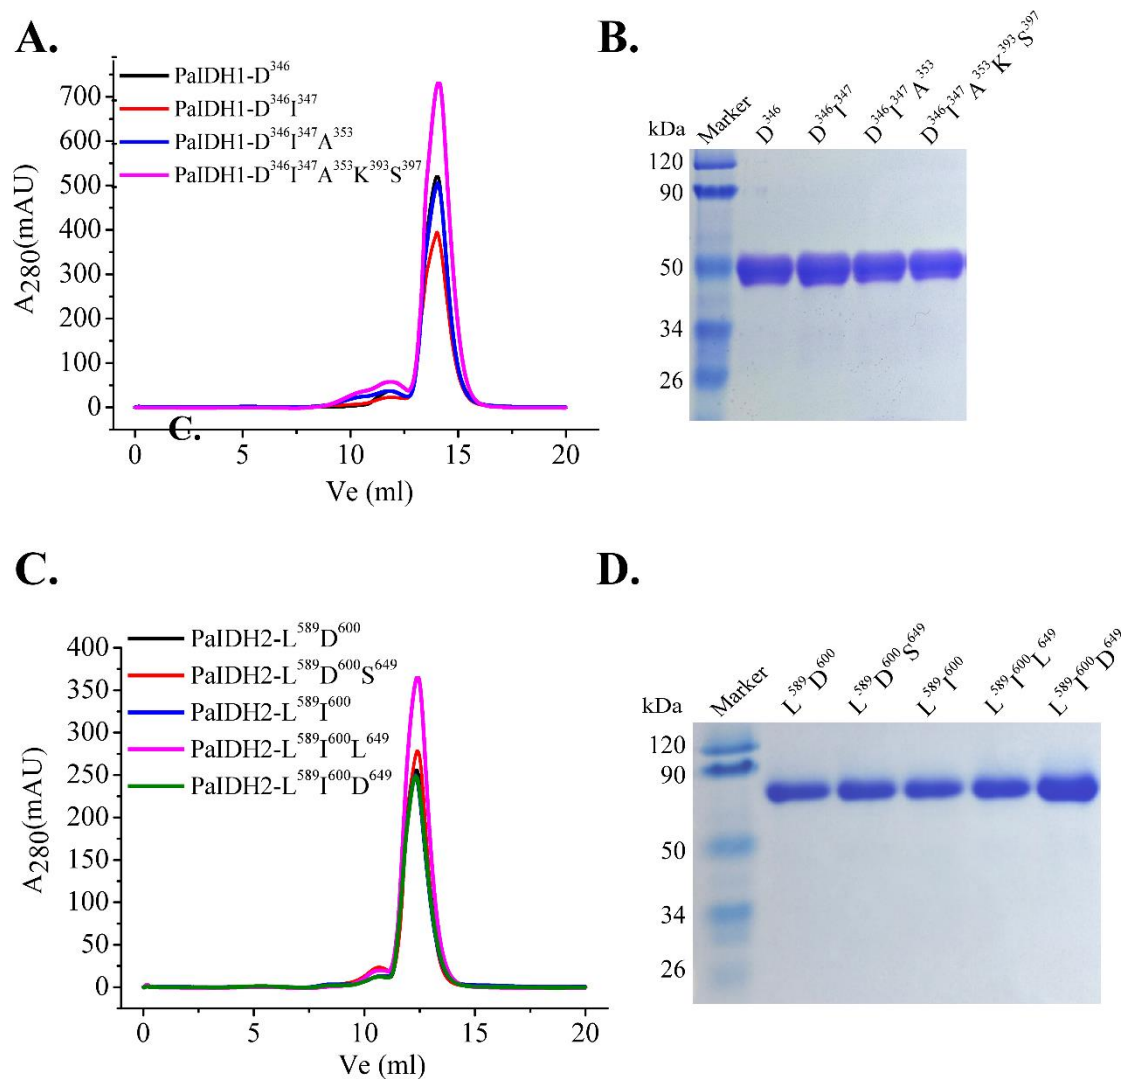

**Figure S1.** Determination of the molecular mass of PaIDH1 and PaIDH2 mutants. The flow rate was 0.5ml/min and the proteins in the fractions were monitored at 280 nm. (A) Result of gel filtration chromatography of PaIDH1 mutants. (B) SDS-PAGE of PaIDH1 mutants. (C) Result of gel filtration chromatography of PaIDH2 mutants. (D) SDS-PAGE of PaIDH2 mutants.
